# Supplementary material for: RETRACTED: Identification and characterization of GRIM-1, a cell-death-associated gene product
Source: Oxford University Press journal article supplement (doi:10.1242/jcs.070250), 2010-07-28
Supplement: jcs070250tables1.pdf [file jcs070250tables1.pdf]

Supplementary Table S1: Human GRIM1 like sequences reported in the NCBI-GenBank databases

| <b>NCBI<br/>Acc No</b> | <b>mRNA<br/>size (nt)</b> | <b>Additional Information – CDS, Source <i>etc</i></b>       | <b>Remarks</b>      |
|------------------------|---------------------------|--------------------------------------------------------------|---------------------|
| AK001401               | 2844                      | 280-1839. teratocarcinoma, in-frame 2-nt deletion            | Similar to $\beta$  |
| AK024656               | 2378                      | 297-1355. primary endothelial cells of human coronary artery | Similar to $\gamma$ |
| AK092962               | 2844                      | No marked ORF. From spleen                                   |                     |
| AK296789               | 2065                      | 91-1740. Tounge tumor                                        |                     |
| BC017204               | 2498                      | 98-1831. Skin, melanotic melanoma                            |                     |
| BC017274               | 2501                      | 86-1819. Skin, melanotic melanoma, high MDR                  | Similar to $\alpha$ |
| BC025270               | 2498                      | 98-1831. Skin, melanotic melanoma                            |                     |
| BC032671               | 2865                      | 112-1845. Skin, melanotic melanoma                           |                     |
| BC039830               | 2812                      | 41-1774. Skin, melanotic melanoma                            |                     |
| BC047879               | 2829                      | 59-1792. Skin, melanotic melanoma                            |                     |
| BX641074               | 4035                      | Not fully spliced. human small intestine                     | Similar to $\gamma$ |
| CR602146               | 1058                      | Placenta Cot 25-normalized                                   |                     |
