# Supplementary material for: RETRACTED: Identification and characterization of GRIM-1, a cell-death-associated gene product
Source: Oxford University Press journal article supplement (doi:10.1242/jcs.070250), 2010-07-28
Supplement: jcs070250tables2.pdf [file jcs070250tables2.pdf]

**Table S2: Human-specific primers in the 5'ETS-18S region for measuring rRNA processing.**

| ID | Name          | Sequence (5' → 3')           | Remarks                                                     |
|----|---------------|------------------------------|-------------------------------------------------------------|
| 1  | 18S Rev       | GCGGGACACTCAGCTAAGAGC        | Used in 1 <sup>st</sup> strand synthesis                    |
| 2  | ETS-18S Fwd   | CTCGCCGCGCTCTACCTTACCTACCTGG | Detects unprocessed rRNA<br>using a specific forward primer |
| 3  | 18S Rev (ETS) | GCGCCCGTCGGCATGTATTAGCTC     |                                                             |
| 4  | ETS Fwd (18S) | GGGGGGCGGGTGGTTGGGGCGTCC     | Detects unprocessed rRNA<br>using a specific reverse primer |
| 5  | 18S-ETS Rev   | GGCAGGATCAACCAGGTAGGTAAGG    |                                                             |
| 6  | 18S Fwd       | GGCCCTGTAATTGGAATGAG         | Detects both processed and<br>unprocessed rRNA              |

See Fig 8 for relative positions of the primers.
