# Supplementary figures and images for: RETRACTED: Identification and characterization of GRIM-1, a cell-death-associated gene product
Source: Oxford University Press journal article supplement (doi:10.1242/jcs.070250), 2010-07-28

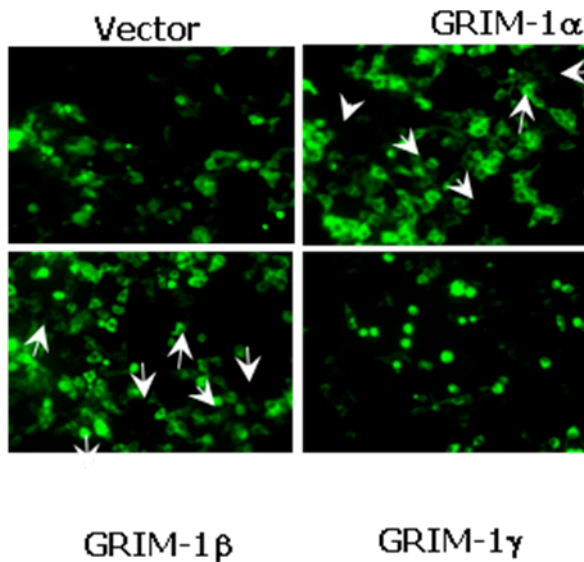

Supplement: jcs070250figs1.pdf [file jcs070250figs1.pdf]

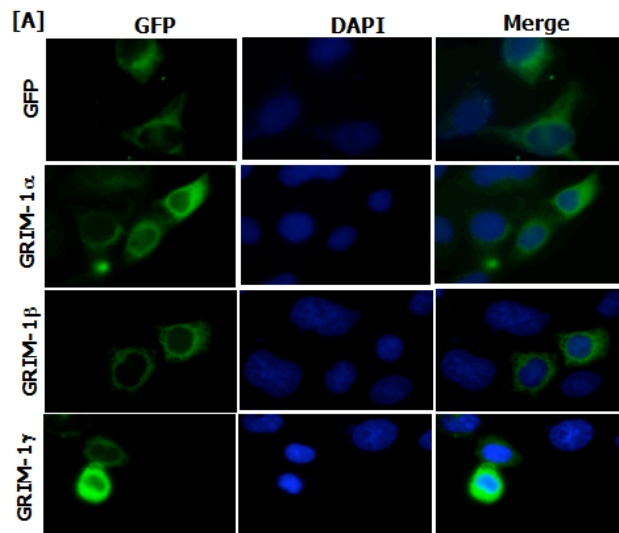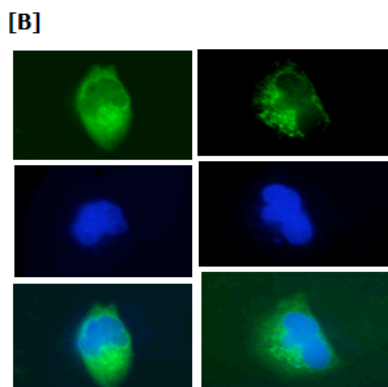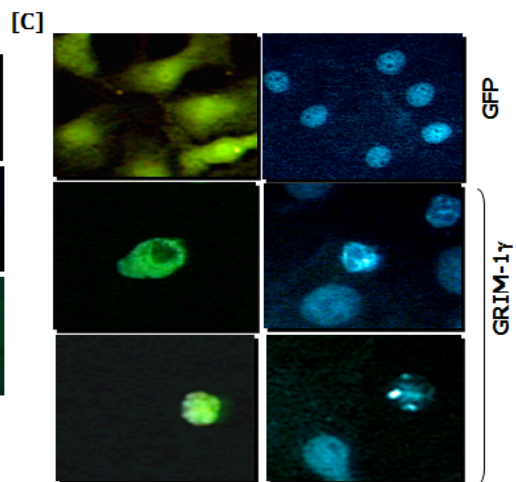

Supplement: jcs070250figs2.pdf [file jcs070250figs2.pdf]
